# Supplementary material for: Bodily sensations in social scenarios: Where in the body?
Source: PubMed Central journal article supplement (PMC6559636; doi:10.1371/journal.pone.0206270), 2019-06-11
Supplement: pone.0206270.s001.pdf [file pone.0206270.s001.pdf]

**S1 Table: Results of the one-sample t-tests for positive social scenarios**

| Scenario            | Target | Body part | <i>M</i> | <i>SE</i> | <i>t</i> -value | <i>df</i> | <i>p</i>       |
|---------------------|--------|-----------|----------|-----------|-----------------|-----------|----------------|
| Birth               | Self   | Head      | 12.46    | 1.26      | 9.87            | 90        | < <b>0.001</b> |
|                     |        | Chest     | 14.23    | 1.17      | 12.17           | 90        | < <b>0.001</b> |
|                     |        | Abdomen   | 6.11     | 1.24      | 4.91            | 90        | < <b>0.001</b> |
|                     |        | Arms      | 4.67     | 1.10      | 4.26            | 90        | < <b>0.001</b> |
|                     |        | Legs      | -1.26    | 1.31      | -0.96           | 90        | 0.338          |
|                     | Other  | Head      | 10.29    | 1.46      | 7.04            | 90        | < <b>0.001</b> |
|                     |        | Chest     | 13.12    | 1.14      | 11.48           | 90        | < <b>0.001</b> |
|                     |        | Abdomen   | 3.32     | 1.37      | 2.43            | 90        | 0.017          |
|                     |        | Arms      | 3.56     | 1.05      | 3.39            | 90        | 0.001          |
|                     |        | Legs      | -0.98    | 1.16      | -0.84           | 90        | 0.401          |
| Romantic acceptance | Self   | Head      | 9.56     | 1.51      | 6.33            | 90        | < <b>0.001</b> |
|                     |        | Chest     | 13.30    | 1.21      | 11.03           | 90        | < <b>0.001</b> |
|                     |        | Abdomen   | 9.30     | 1.39      | 6.69            | 90        | < <b>0.001</b> |
|                     |        | Arms      | 3.45     | 0.96      | 3.59            | 90        | <b>0.001</b>   |
|                     |        | Legs      | -2.38    | 1.33      | -1.79           | 90        | 0.077          |
|                     | Other  | Head      | 7.85     | 1.64      | 4.78            | 90        | < <b>0.001</b> |
|                     |        | Chest     | 14.81    | 1.08      | 13.69           | 90        | < <b>0.001</b> |
|                     |        | Abdomen   | 6.12     | 1.91      | 3.20            | 90        | 0.002          |
|                     |        | Arms      | 3.41     | 1.20      | 2.85            | 90        | 0.005          |
|                     |        | Legs      | -0.44    | 1.27      | -0.34           | 90        | 0.732          |
| Inclusion           | Self   | Head      | 8.80     | 1.35      | 6.51            | 90        | < <b>0.001</b> |
|                     |        | Chest     | 8.59     | 1.25      | 6.86            | 90        | < <b>0.001</b> |
|                     |        | Abdomen   | 2.00     | 1.39      | 1.44            | 90        | 0.152          |
|                     |        | Arms      | 3.06     | 0.97      | 3.16            | 90        | 0.002          |
|                     |        | Legs      | 1.45     | 0.89      | 1.63            | 90        | 0.107          |
|                     | Other  | Head      | 10.43    | 1.31      | 7.98            | 90        | < <b>0.001</b> |
|                     |        | Chest     | 7.97     | 1.45      | 5.49            | 90        | < <b>0.001</b> |
|                     |        | Abdomen   | 1.40     | 1.25      | 1.12            | 90        | 0.265          |
|                     |        | Arms      | 2.86     | 1.02      | 2.81            | 90        | 0.006          |
|                     |        | Legs      | 0.87     | 0.94      | 0.93            | 90        | 0.355          |
| Positive evaluation | Self   | Head      | 9.81     | 0.84      | 11.66           | 90        | < <b>0.001</b> |
|                     |        | Chest     | 8.26     | 0.77      | 10.68           | 90        | < <b>0.001</b> |
|                     |        | Abdomen   | 1.12     | 0.77      | 1.46            | 90        | 0.148          |
|                     |        | Arms      | 1.90     | 0.72      | 2.64            | 90        | 0.010          |
|                     |        | Legs      | -0.67    | 0.43      | -1.58           | 90        | 0.118          |
|                     | Other  | Head      | 12.84    | 1.24      | 10.37           | 90        | < <b>0.001</b> |
|                     |        | Chest     | 9.10     | 1.14      | 7.99            | 90        | < <b>0.001</b> |
|                     |        | Abdomen   | -1.16    | 1.17      | -0.99           | 90        | 0.324          |
|                     |        | Arms      | 2.91     | 0.96      | 3.03            | 90        | 0.003          |
|                     |        | Legs      | -1.57    | 0.84      | -1.88           | 90        | 0.064          |
