# Supplementary material for: Bodily sensations in social scenarios: Where in the body?
Source: PubMed Central journal article supplement (PMC6559636; doi:10.1371/journal.pone.0206270), 2019-06-11
Supplement: pone.0206270.s002.pdf [file pone.0206270.s002.pdf]

**S2 Table: Results of the one-sample t-tests for negative social scenarios**

| Scenario            | Target | Body part | <i>M</i> | <i>SE</i> | <i>t</i> -value | <i>df</i> | <i>p</i>       |
|---------------------|--------|-----------|----------|-----------|-----------------|-----------|----------------|
| Bereavement         | Self   | Head      | 3.93     | 2.00      | 1.97            | 90        | 0.052          |
|                     |        | Chest     | 5.69     | 1.67      | 3.40            | 90        | 0.001          |
|                     |        | Abdomen   | -0.51    | 1.53      | -0.33           | 90        | 0.740          |
|                     |        | Arms      | -2.83    | 1.42      | -1.99           | 90        | 0.050          |
|                     |        | Legs      | -5.46    | 1.19      | -4.60           | 90        | < <b>0.001</b> |
|                     | Other  | Head      | 2.42     | 1.90      | 1.28            | 90        | 0.205          |
|                     |        | Chest     | 7.40     | 1.37      | 5.41            | 90        | < <b>0.001</b> |
|                     |        | Abdomen   | -0.27    | 1.39      | -0.20           | 90        | 0.845          |
|                     |        | Arms      | -2.36    | 1.27      | -1.85           | 90        | 0.068          |
|                     |        | Legs      | -5.41    | 1.08      | -5.02           | 90        | < <b>0.001</b> |
| Romantic rejection  | Self   | Head      | 6.10     | 1.76      | 3.47            | 90        | 0.001          |
|                     |        | Chest     | 8.51     | 1.61      | 5.28            | 90        | < <b>0.001</b> |
|                     |        | Abdomen   | 1.92     | 1.45      | 1.32            | 90        | 0.189          |
|                     |        | Arms      | -3.07    | 1.17      | -2.63           | 90        | 0.010          |
|                     |        | Legs      | -4.78    | 0.89      | -5.40           | 90        | < <b>0.001</b> |
|                     | Other  | Head      | 4.32     | 1.73      | 2.50            | 90        | 0.014          |
|                     |        | Chest     | 8.44     | 1.41      | 5.98            | 90        | < <b>0.001</b> |
|                     |        | Abdomen   | 0.79     | 1.55      | 0.51            | 90        | 0.612          |
|                     |        | Arms      | -2.08    | 1.18      | -1.77           | 90        | 0.081          |
|                     |        | Legs      | -3.40    | 1.04      | -3.27           | 90        | 0.002          |
| Exclusion           | Self   | Head      | 4.34     | 1.69      | 2.56            | 90        | 0.012          |
|                     |        | Chest     | 5.37     | 1.39      | 3.87            | 90        | < <b>0.001</b> |
|                     |        | Abdomen   | 0.12     | 1.19      | 0.10            | 90        | 0.918          |
|                     |        | Arms      | 3.37     | 1.10      | 3.07            | 90        | 0.003          |
|                     |        | Legs      | -0.41    | 0.91      | -0.45           | 90        | 0.654          |
|                     | Other  | Head      | 7.26     | 1.73      | 4.19            | 90        | < <b>0.001</b> |
|                     |        | Chest     | 3.49     | 1.43      | 2.43            | 90        | 0.017          |
|                     |        | Abdomen   | 0.46     | 1.42      | 0.32            | 90        | 0.749          |
|                     |        | Arms      | 0.33     | 1.20      | 0.27            | 90        | 0.786          |
|                     |        | Legs      | -4.05    | 1.24      | -3.27           | 90        | 0.002          |
| Negative evaluation | Self   | Head      | 8.43     | 1.62      | 5.21            | 90        | < <b>0.001</b> |
|                     |        | Chest     | 4.12     | 1.32      | 3.12            | 90        | 0.002          |
|                     |        | Abdomen   | 1.35     | 1.61      | 0.84            | 90        | 0.402          |
|                     |        | Arms      | 3.60     | 1.16      | 3.11            | 90        | 0.003          |
|                     |        | Legs      | -2.23    | 0.85      | -2.62           | 90        | 0.010          |
|                     | Other  | Head      | 4.46     | 1.45      | 3.09            | 90        | 0.003          |
|                     |        | Chest     | 6.35     | 1.46      | 4.35            | 90        | < <b>0.001</b> |
|                     |        | Abdomen   | 1.09     | 1.28      | 0.85            | 90        | 0.396          |
|                     |        | Arms      | 1.82     | 1.16      | 1.57            | 90        | 0.121          |
|                     |        | Legs      | -3.12    | 1.17      | -2.67           | 90        | 0.009          |
