# Supplementary material for: Bodily sensations in social scenarios: Where in the body?
Source: PubMed Central journal article supplement (PMC6559636; doi:10.1371/journal.pone.0206270), 2019-06-11
Supplement: pone.0206270.s003.pdf [file pone.0206270.s003.pdf]

**S3 Table: Statistics of the *Valence x Scenario x Target x Body part* repeated-measure ANOVA**

| <i>Effect</i>                            | <i>df</i> | <i>F-value</i> | <i>p</i>          |
|------------------------------------------|-----------|----------------|-------------------|
| <i>Intercept</i>                         | 1         | 146.18         | <b>&lt; 0.001</b> |
| <i>Error</i>                             | 90        |                |                   |
| <i>Valence</i>                           | 1         | 28.78          | <b>&lt; 0.001</b> |
| <i>Error</i>                             | 90        |                |                   |
| <i>Scenario</i>                          | 3         | 1.28           | 0.281             |
| <i>Error</i>                             | 270       |                |                   |
| <i>Target</i>                            | 1         | 4.84           | <b>0.030</b>      |
| <i>Error</i>                             | 90        |                |                   |
| <i>Body part</i>                         | 4         | 76.68          | <b>&lt; 0.001</b> |
| <i>Error</i>                             | 360       |                |                   |
| <i>Valence*Scenario</i>                  | 3         | 10.83          | <b>&lt; 0.001</b> |
| <i>Error</i>                             | 270       |                |                   |
| <i>Valence*Target</i>                    | 1         | 0.10           | 0.755             |
| <i>Error</i>                             | 90        |                |                   |
| <i>Scenario*Target</i>                   | 3         | 0.21           | 0.889             |
| <i>Error</i>                             | 270       |                |                   |
| <i>Valence*Body part</i>                 | 4         | 1.64           | 0.163             |
| <i>Error</i>                             | 360       |                |                   |
| <i>Scenario*Body part</i>                | 12        | 6.25           | <b>&lt; 0.001</b> |
| <i>Error</i>                             | 1080      |                |                   |
| <i>Target*Body part</i>                  | 4         | 1.25           | 0.289             |
| <i>Error</i>                             | 360       |                |                   |
| <i>Valence*Scenario*Target</i>           | 3         | 1.92           | 0.127             |
| <i>Error</i>                             | 270       |                |                   |
| <i>Valence*Scenario*Body part</i>        | 12        | 2.12           | <b>0.013</b>      |
| <i>Error</i>                             | 1080      |                |                   |
| <i>Valence*Target*Body part</i>          | 4         | 1.78           | 0.132             |
| <i>Error</i>                             | 360       |                |                   |
| <i>Scenario*Target*Body part</i>         | 12        | 2.17           | <b>0.011</b>      |
| <i>Error</i>                             | 1080      |                |                   |
| <i>Valence*Scenario*Target*Body part</i> | 12        | 1.26           | 0.239             |
| <i>Error</i>                             | 1080      |                |                   |
