# Supplementary material for: Bodily sensations in social scenarios: Where in the body?
Source: PubMed Central journal article supplement (PMC6559636; doi:10.1371/journal.pone.0206270), 2019-06-11
Supplement: pone.0206270.s004.pdf [file pone.0206270.s004.pdf]

**Table S4: Results of the one-sample t-tests for basic emotions**

| Emotion   | Body part | <i>M</i> | <i>SE</i> | <i>t</i> -value | <i>df</i> | <i>p</i>          |
|-----------|-----------|----------|-----------|-----------------|-----------|-------------------|
| Sadness   | Head      | 2.27     | 1.81      | 1.26            | 90        | 0.212             |
|           | Chest     | 0.40     | 1.69      | 0.24            | 90        | 0.812             |
|           | Abdomen   | -1.68    | 0.96      | -1.75           | 90        | 0.083             |
|           | Arms      | -5.64    | 1.23      | -4.60           | 90        | <b>&lt; 0.001</b> |
|           | Legs      | -4.73    | 0.91      | -5.19           | 90        | <b>&lt; 0.001</b> |
| Anger     | Head      | 10.85    | 1.43      | 7.61            | 90        | <b>&lt; 0.001</b> |
|           | Chest     | 9.42     | 1.30      | 7.23            | 90        | <b>&lt; 0.001</b> |
|           | Abdomen   | 2.57     | 1.21      | 2.13            | 90        | 0.036             |
|           | Arms      | 9.77     | 1.08      | 9.06            | 90        | <b>&lt; 0.001</b> |
|           | Legs      | 1.01     | 1.11      | 0.92            | 90        | 0.362             |
| Fear      | Head      | 2.91     | 1.77      | 1.65            | 90        | 0.103             |
|           | Chest     | 10.98    | 1.34      | 8.22            | 90        | <b>&lt; 0.001</b> |
|           | Abdomen   | 2.68     | 1.20      | 2.24            | 90        | 0.028             |
|           | Arms      | -0.64    | 1.11      | -0.58           | 90        | 0.566             |
|           | Legs      | -2.31    | 1.31      | -1.76           | 90        | 0.082             |
| Disgust   | Head      | 8.19     | 1.42      | 5.78            | 90        | <b>&lt; 0.001</b> |
|           | Chest     | 2.28     | 1.46      | 1.56            | 90        | 0.123             |
|           | Abdomen   | 1.94     | 1.44      | 1.34            | 90        | 0.182             |
|           | Arms      | -0.67    | 1.08      | -0.62           | 90        | 0.535             |
|           | Legs      | -1.71    | 0.67      | -2.55           | 90        | 0.013             |
| Happiness | Head      | 11.67    | 1.34      | 8.69            | 90        | <b>&lt; 0.001</b> |
|           | Chest     | 11.89    | 1.08      | 11.01           | 90        | <b>&lt; 0.001</b> |
|           | Abdomen   | 4.07     | 1.03      | 3.97            | 90        | <b>&lt; 0.001</b> |
|           | Arms      | 4.60     | 1.18      | 3.89            | 90        | <b>&lt; 0.001</b> |
|           | Legs      | 2.43     | 1.15      | 2.11            | 90        | 0.037             |
| Surprise  | Head      | 10.22    | 1.33      | 7.69            | 90        | <b>&lt; 0.001</b> |
|           | Chest     | 12.12    | 1.37      | 8.86            | 90        | <b>&lt; 0.001</b> |
|           | Abdomen   | -0.16    | 1.16      | -0.14           | 90        | 0.892             |
|           | Arms      | 1.25     | 0.98      | 1.28            | 90        | 0.205             |
|           | Legs      | -2.66    | 0.84      | -3.16           | 90        | 0.002             |
