# Supplementary material for: Bodily sensations in social scenarios: Where in the body?
Source: PubMed Central journal article supplement (PMC6559636; doi:10.1371/journal.pone.0206270), 2019-06-11
Supplement: pone.0206270.s005.pdf [file pone.0206270.s005.pdf]

**S5 Table. Mean and standard deviation of the intensity scores of every emotion for each social scenario for 'self' and 'other' evaluation.** Scores above 3 (mild association) are highlighted; scores above 6 (strong association) are in bold. Asterisks indicate significant results ( $p < 0.05$ ) in pair sample t-tests comparing 'self' and 'other' conditions for each specific emotion.

| SOCIAL SCENARIO     | BASIC EMOTION             | SELF |      | OTHER |      |
|---------------------|---------------------------|------|------|-------|------|
|                     |                           | Mean | SD   | Mean  | SD   |
| BIRTH               | Sadness                   | 0.56 | 1.18 | 0.65  | 1.97 |
|                     | Anger                     | 0.37 | 1.00 | 0.33  | 1.30 |
|                     | Fear                      | 3.93 | 2.80 | 3.37  | 2.70 |
|                     | Disgust*                  | 0.84 | 2.07 | 0.19  | 0.59 |
|                     | Happiness                 | 7.95 | 2.05 | 8.00  | 1.99 |
|                     | Surprise                  | 4.91 | 2.72 | 4.91  | 2.98 |
|                     | <b>Completeness score</b> | 4.58 | 2.90 | 5.60  | 2.95 |
| INCLUSION           | Sadness                   | 0.53 | 1.20 | 1.02  | 2.23 |
|                     | Anger                     | 0.81 | 1.55 | 0.84  | 2.15 |
|                     | Fear                      | 2.00 | 2.36 | 1.70  | 2.08 |
|                     | Disgust                   | 0.74 | 1.59 | 0.56  | 1.75 |
|                     | Happiness                 | 5.42 | 2.39 | 5.93  | 3.06 |
|                     | Surprise                  | 7.14 | 2.21 | 6.65  | 2.60 |
|                     | <b>Completeness score</b> | 6.35 | 2.08 | 6.49  | 2.12 |
| ROMANTIC ACCEPTANCE | Sadness                   | 0.33 | 1.11 | 0.12  | 0.54 |
|                     | Anger*                    | 0.26 | 0.93 | 0.05  | 0.30 |
|                     | Fear                      | 3.21 | 2.89 | 1.98  | 2.24 |
|                     | Disgust                   | 0.40 | 1.48 | 0.02  | 0.15 |
|                     | Happiness                 | 8.05 | 1.79 | 8.00  | 1.63 |
|                     | Surprise*                 | 7.26 | 2.18 | 7.28  | 2.31 |
|                     | <b>Completeness score</b> | 5.37 | 2.82 | 5.44  | 2.66 |
| POSITIVE EVALUATION | Sadness*                  | 0.56 | 1.48 | 0.05  | 0.21 |
|                     | Anger                     | 0.53 | 1.22 | 0.07  | 0.46 |
|                     | Fear                      | 0.79 | 1.67 | 0.40  | 1.07 |
|                     | Disgust                   | 0.16 | 0.65 | 0.00  | 0.00 |
|                     | Happiness                 | 6.60 | 2.46 | 6.77  | 2.47 |
|                     | Surprise                  | 5.09 | 3.11 | 5.40  | 3.01 |
|                     | <b>Completeness score</b> | 5.60 | 2.52 | 6.67  | 2.08 |
| BEREAVEMENT         | Sadness                   | 8.30 | 1.55 | 7.93  | 2.10 |
|                     | Anger*                    | 6.84 | 2.79 | 6.37  | 2.88 |
|                     | Fear                      | 6.93 | 2.59 | 5.72  | 2.98 |
|                     | Disgust                   | 1.77 | 2.88 | 1.72  | 2.84 |
|                     | Happiness                 | 0.14 | 0.56 | 0.21  | 1.08 |
|                     | Surprise                  | 3.72 | 3.49 | 3.09  | 3.09 |
|                     | <b>Completeness score</b> | 2.98 | 2.82 | 4.47  | 2.89 |
| ROMANTIC REJECTION  | Sadness                   | 8.19 | 1.64 | 7.93  | 2.13 |
|                     | Anger                     | 7.00 | 2.60 | 6.60  | 2.86 |
|                     | Fear                      | 4.72 | 3.38 | 4.60  | 3.30 |
|                     | Disgust                   | 3.88 | 3.64 | 3.35  | 3.36 |
|                     | Happiness                 | 0.09 | 0.29 | 0.09  | 0.29 |
|                     | Surprise                  | 4.49 | 3.28 | 3.53  | 3.30 |
|                     | <b>Completeness score</b> | 4.09 | 2.71 | 5.49  | 2.49 |
| EXCLUSION           | Sadness                   | 5.07 | 2.88 | 5.63  | 2.54 |
|                     | Anger                     | 5.00 | 2.89 | 4.98  | 2.69 |
|                     | Fear                      | 1.84 | 2.53 | 1.84  | 2.50 |
|                     | Disgust*                  | 2.86 | 2.86 | 2.79  | 2.87 |
|                     | Happiness                 | 0.58 | 1.50 | 0.09  | 0.29 |

|                        |                           |      |      |      |      |
|------------------------|---------------------------|------|------|------|------|
|                        | Surprise                  | 5.23 | 3.13 | 4.51 | 3.51 |
|                        | <b>Completeness score</b> | 5.77 | 2.21 | 6.42 | 2.05 |
| NEGATIVE<br>EVALUATION | Sadness                   | 5.30 | 2.57 | 5.67 | 2.79 |
|                        | Anger                     | 4.60 | 2.85 | 5.00 | 2.79 |
|                        | Fear                      | 2.40 | 2.84 | 2.28 | 2.61 |
|                        | Disgust                   | 1.86 | 2.44 | 2.51 | 2.86 |
|                        | Happiness                 | 0.26 | 0.69 | 0.42 | 1.37 |
|                        | Surprise                  | 3.79 | 2.73 | 4.00 | 3.22 |
|                        | <b>Completeness score</b> | 5.37 | 2.54 | 5.70 | 2.42 |
