# Supplementary material for: Bodily sensations in social scenarios: Where in the body?
Source: PubMed Central journal article supplement (PMC6559636; doi:10.1371/journal.pone.0206270), 2019-06-11
Supplement: pone.0206270.s008.pdf [file pone.0206270.s008.pdf]

## S2 Appendix

### BVAQ (Italian version)

Indica quanto sei d'accordo o in disaccordo con ciascuna delle seguenti affermazioni, cliccando sulla casella corrispondente. Scegli l'opzione centrale soltanto se davvero non sei nella possibilità di valutare il tuo comportamento.

|                                                                               | Non sono per niente d'accordo | Non sono molto d'accordo | Non sono né in accordo né in disaccordo | Sono piuttosto in accordo | Sono completamente d'accordo |
|-------------------------------------------------------------------------------|-------------------------------|--------------------------|-----------------------------------------|---------------------------|------------------------------|
| 1- La gente spesso mi dice che dovrei parlare di più dei miei sentimenti.     |                               |                          |                                         |                           |                              |
| 2- Mi capita raramente di fantasticare.                                       |                               |                          |                                         |                           |                              |
| 3- Non so tutto quello che mi passa per la mente.                             |                               |                          |                                         |                           |                              |
| 4- Quando vedo qualcuno che piange molto intensamente, resto imperturbabile.  |                               |                          |                                         |                           |                              |
| 5- Non c'è molto da capire quando si ha a che fare con le emozioni.           |                               |                          |                                         |                           |                              |
| 6- Quando sono seccato per qualcosa, parlo con gli altri dei miei sentimenti. |                               |                          |                                         |                           |                              |
| 7- Mi piace immaginare storie strane, piene di immaginazione.                 |                               |                          |                                         |                           |                              |
| 8- Quando mi sento molto giù, so se ho paura, sono scoraggiato o triste.      |                               |                          |                                         |                           |                              |
| 9- Sono spesso sopraffatto emotivamente dagli eventi imprevisti.              |                               |                          |                                         |                           |                              |
| 10- Penso che si debba essere in sintonia con i propri sentimenti.            |                               |                          |                                         |                           |                              |
| 11- Sono in grado di esprimere verbalmente i miei sentimenti.                 |                               |                          |                                         |                           |                              |

|                                                                                                                              |  |  |  |  |  |
|------------------------------------------------------------------------------------------------------------------------------|--|--|--|--|--|
| 12- Penso che fantasticare su cose o eventi immaginari sia una perdita di tempo.                                             |  |  |  |  |  |
| 13- Quando sono stufo di tutto, non riesco a capire se sono triste, ho paura o sono infelice.                                |  |  |  |  |  |
| 14- Quando gli amici intorno a me discutono violentemente, io ne rimango turbato                                             |  |  |  |  |  |
| 15- Trovo strano che gli altri analizzino così spesso le loro emozioni.                                                      |  |  |  |  |  |
| 16- Quando parlo con la gente, sono più propenso a discutere delle mie attività quotidiane piuttosto che delle mie emozioni. |  |  |  |  |  |
| 17- Quando non ho molto da fare, passo il tempo a sognare ad occhi aperti.                                                   |  |  |  |  |  |
| 18- Quando sono di ottimo umore, riesco a capire se sono entusiasta o allegro o euforico.                                    |  |  |  |  |  |
| 19- Quando vedo qualcuno che piange molto intensamente, mi sento profondamente triste.                                       |  |  |  |  |  |
| 20- Quando sono teso, voglio capire esattamente da dove proviene quel sentimento                                             |  |  |  |  |  |
